# Supplementary material for: A novel approach to improve the oil miscibility and incorporate multifunctionality in ionic liquids as lubricant additives
Source: Royal Society of Chemistry journal article supplement (doi:10.1039/d0cp05295g), 2021-01-01
Supplement: d0cp05295g1.pdf [file d0cp05295g1.pdf]

## Supplementary information

### 1. Mass spectroscopy

P<sub>66614</sub> BEHP: ES<sup>+</sup>, 483.3 { [C<sub>6</sub>H<sub>13</sub>]<sub>3</sub> C<sub>14</sub>H<sub>29</sub>P<sup>+</sup> }; ES<sup>-</sup> 321.2 , { [C<sub>8</sub>H<sub>17</sub>O ]<sub>2</sub> OPO<sup>-</sup> }

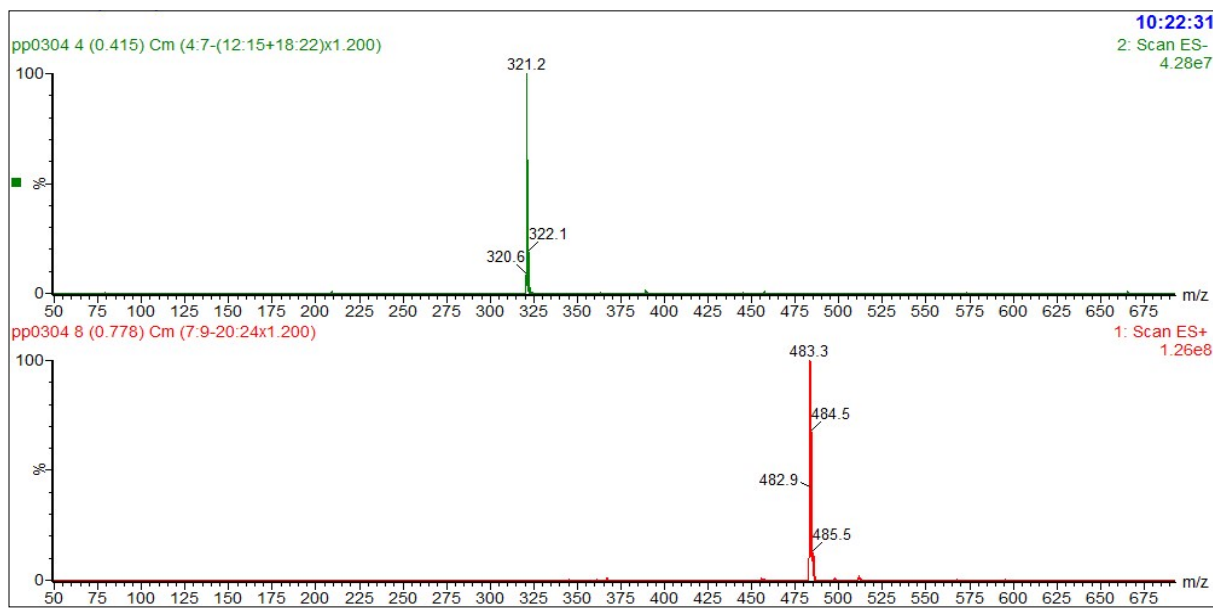

### 2. NMR Characterization

*Neat Ionic Liquids:*

<sup>1</sup>H NMR(CDCl<sub>3</sub>) of Neat ILs are mentioned below:

#### P<sub>66614</sub> BEHP

The <sup>1</sup>H NMR of P<sub>66614</sub>BEHP is:

<sup>1</sup>H NMR δ<sub>H</sub> (400 MHz, CDCl<sub>3</sub>, ppm relative to TMS): 3.70 (m, 4H), 2.40 (m,8H), 1.52-1.21 (m,66H), 0.857(m,24H)

#### P<sub>66614</sub> TMP

<sup>1</sup>H NMR δ<sub>H</sub> (400 MHz, CDCl<sub>3</sub>, ppm relative to TMS): 2.55–2.49 (m, 8H), 2.03–1.98 (m, 4H), 1.57–1.12 (m, 62H), 0.93–0.84 (m, 30H)

#### P<sub>66614</sub> Dec

<sup>1</sup>H NMR δ<sub>H</sub> (400 MHz, CDCl<sub>3</sub>, ppm relative to TMS): 0.85-0.91 (m,8H), 1.22-1.31(m, 40 H),1.64 (m, 18H),1.85 (m,1H),2.15(m, 2H) , 2.41 (m, 8H)

## P<sub>66614</sub> DPP

<sup>1</sup>H NMR δ<sub>H</sub> (400 MHz, CDCl<sub>3</sub>, ppm relative to TMS): 7.29–7.27 (m, 4H), 7.20–7.16 (m, 4H), 6.96–6.92 (m, 2H), 2.30–2.22 (m, 8H), 1.45–1.24 (m, 24H), 0.90–0.83 (m, 12H).

### PIBSA/Ionic Liquid Blends:

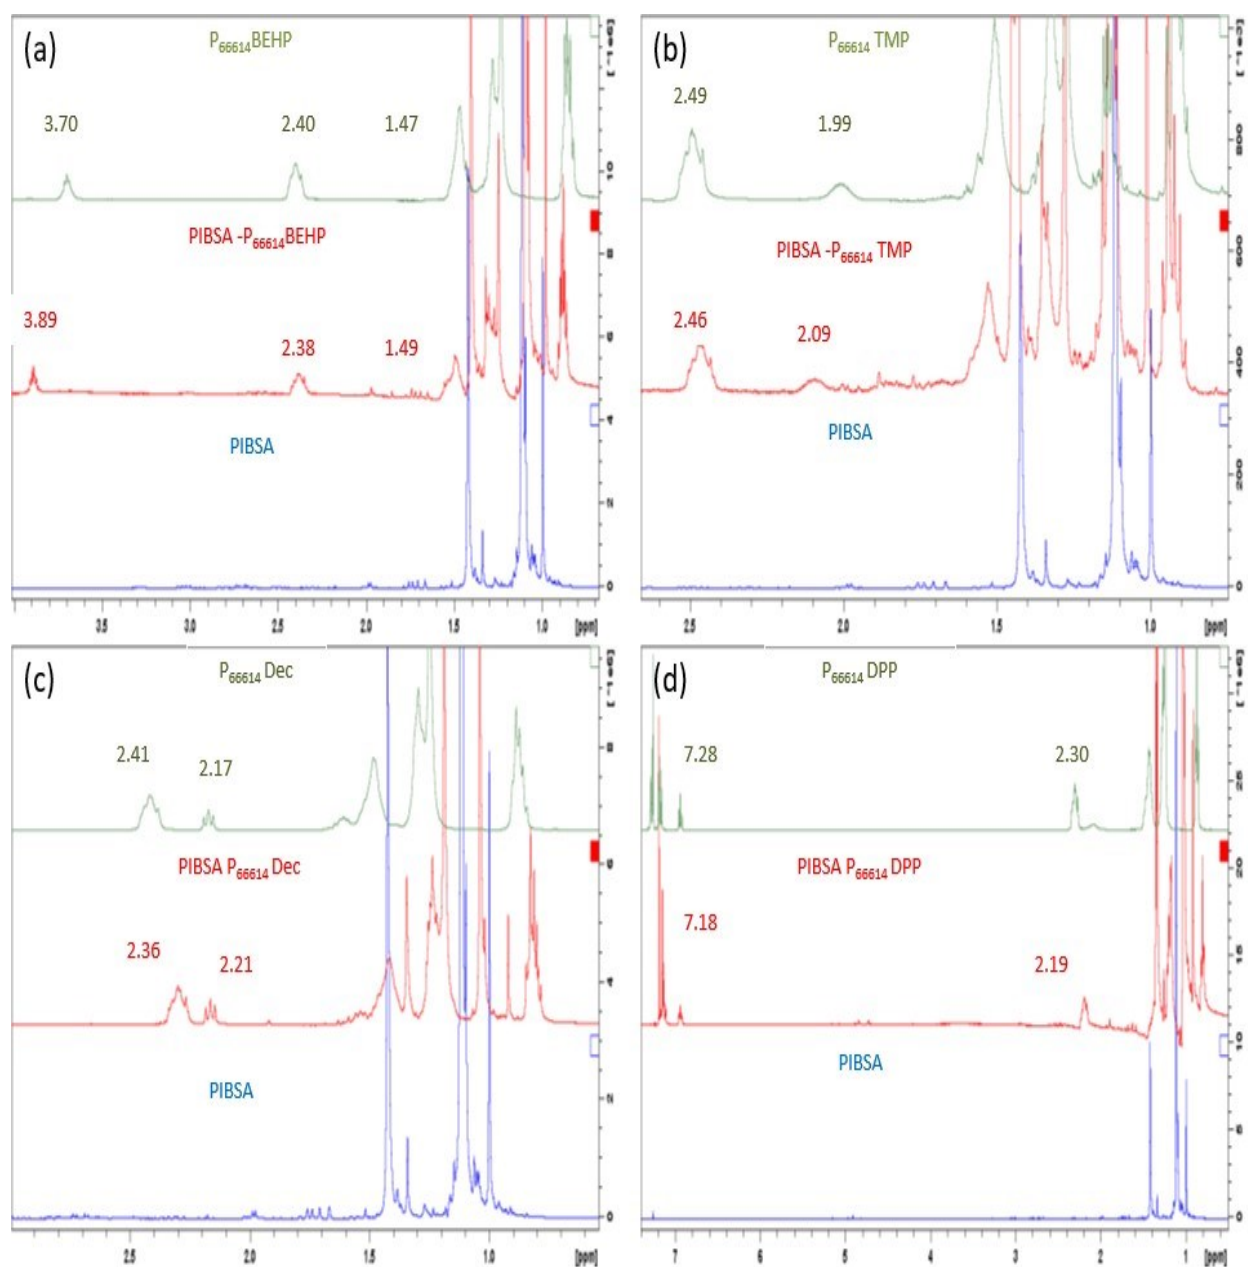

S11: <sup>1</sup>H NMR of PIBSA, P<sub>66614</sub> anion, PIBSA/P<sub>66614</sub> anion which shows shifting of peaks which shows weak interaction between the two

### 3. IR characterizations:

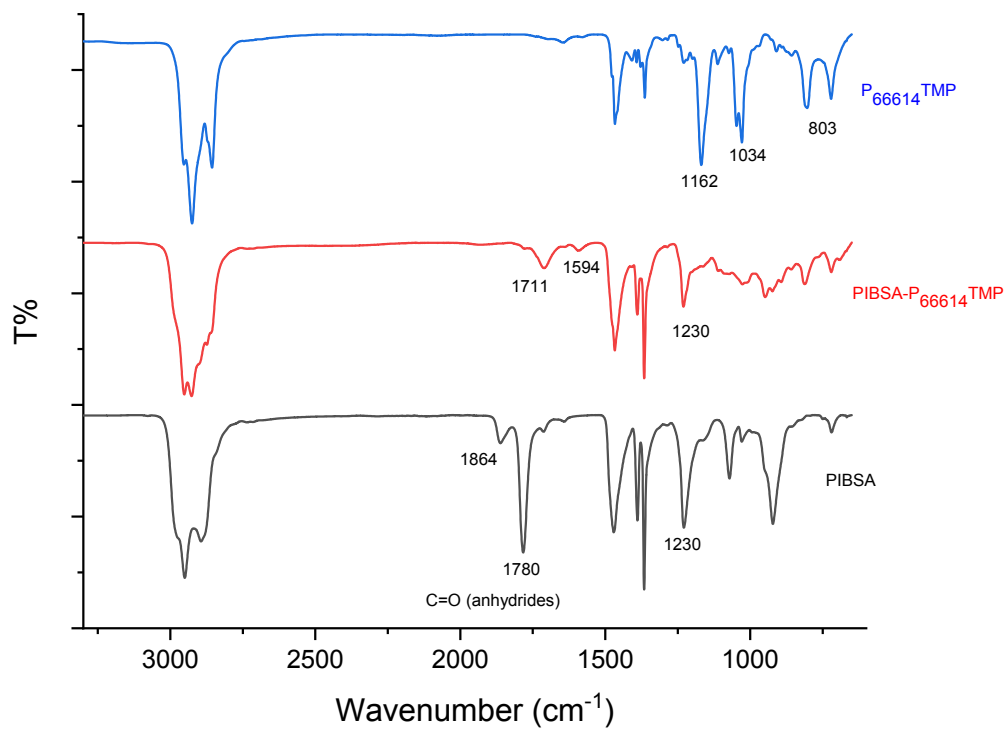

SI 2 IR spectra of IR spectra of (a) PIBSA (black) (b) PIBSA-P<sub>66614</sub> TMP (Red) (c) P<sub>66614</sub> TMP (blue)

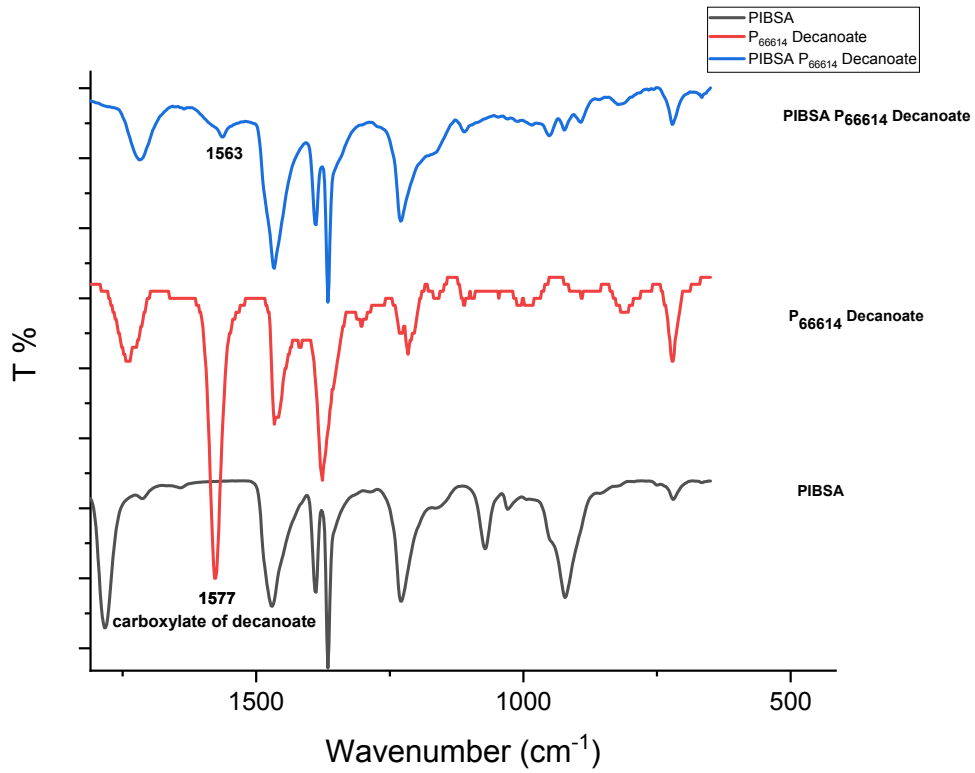

SI 3 IR spectra of (a) PIBSA (black) (b) PIBSA-P<sub>66614</sub> Dec (Red) (c) P<sub>66614</sub> Dec (blue)

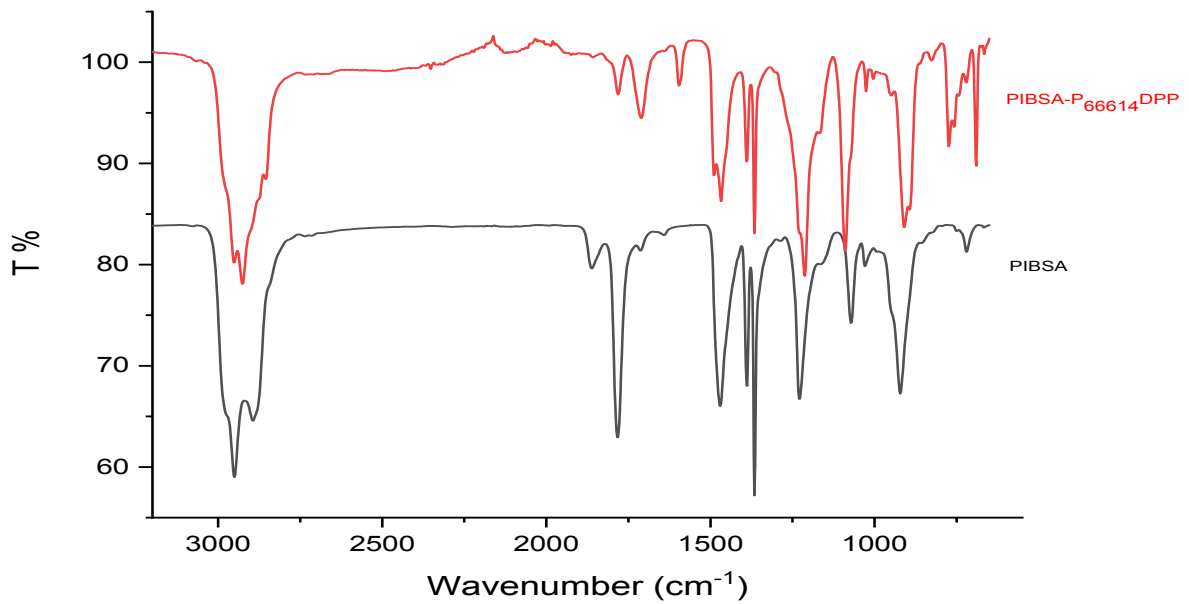

SI4 IR spectra of (a) PIBSA (black) (b) PIBSA-P<sub>66614</sub> DPP (blue)

#### 4. SRV test

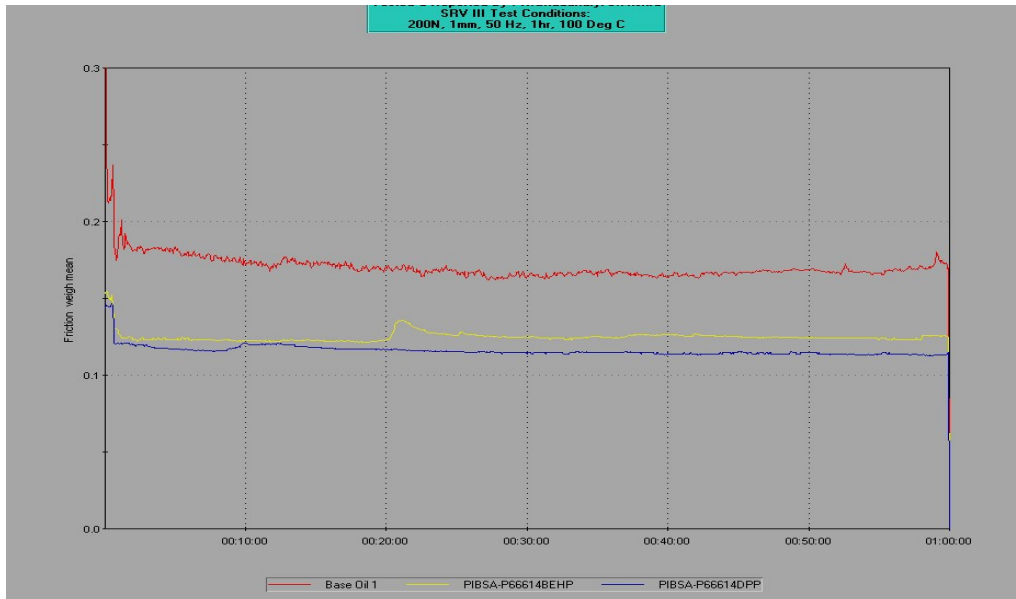

SI 5: SRV test at 200N, 1mm surface, 50Hz, 100 °C for duration of 1 hrs by comparing of COF of

(a) Base oil (red) (b) PIBSA-P<sub>66614</sub>BEHP (yellow) (c) PIBSA P<sub>66614</sub> DPP (blue)

#### 5. SEM Images

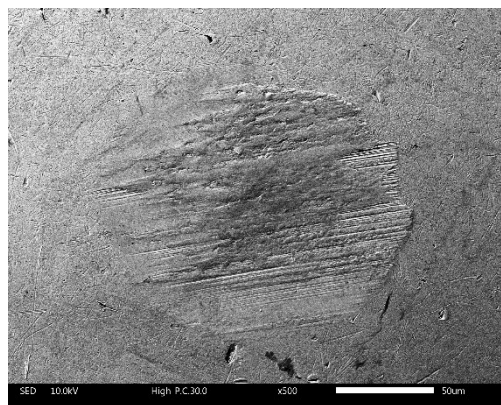

Base oil -15N, 200mm/min

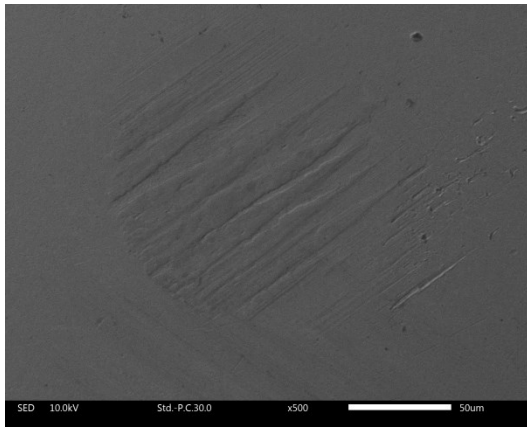

PIBSA-P<sub>66614</sub> Dec , 15N, 200mm/min

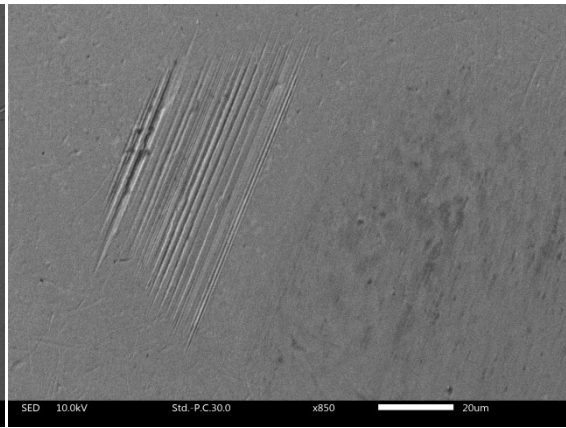

PIBSA-P<sub>66614</sub> DPP, 15N, 200mm/min

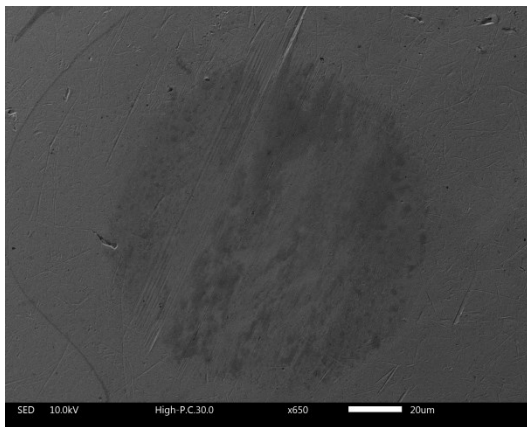

PIBSA-P66614 BMLB, 15N, 200mm/min

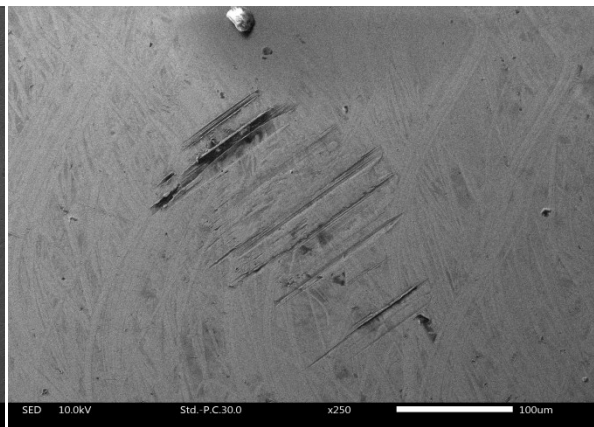

PIBSA-P66614 TMP, 15N, 200mm/min

SI6: SEM Images of PIBSA blend ILs
